# Wild emmer introgressions alter root-to-shoot growth dynamics under water stress

Harel Bacher<sup>1,2</sup>, Feiyu Zhu<sup>3</sup>, Tian Gao<sup>3</sup>, Kan Liu<sup>5</sup>, Balpreet K Dhatt<sup>2</sup>, Tala Awada<sup>4</sup>, Chi Zhang<sup>5</sup>,  
Assaf Distelfeld<sup>6</sup>, Hongfeng Yu<sup>3</sup>, Zvi Peleg<sup>1\*</sup>, Harkamal Walia<sup>2\*</sup>

<sup>1</sup>The Robert H. Smith Institute of Plant Sciences and Genetics in Agriculture, The Hebrew University of Jerusalem, Rehovot, Israel.

<sup>2</sup>Department of Agronomy and Horticulture, University of Nebraska-Lincoln, Lincoln, NE, USA.

<sup>3</sup>Department of Computer Science and Engineering, University of Nebraska-Lincoln, Lincoln, NE, USA.

<sup>4</sup>School of Natural Resources, University of Nebraska-Lincoln, Lincoln, NE, USA.

<sup>5</sup>School of Biological Sciences, University of Nebraska-Lincoln, Lincoln, NE, USA.

<sup>6</sup>The Institute of Evolution, University of Haifa, Haifa, Israel.

## List of author contributions:

HB, HW, TA and ZP designed the experiments. ZP and AD generated the genetic materials. HB and BD conducted the physiological and transcriptome experiments. FZ, TG and HY processed the image data. HB, KL and CZ performed transcriptome data analysis. HB, HW and ZP wrote the paper. All authors have read and approve the manuscript.

\*Corresponding authors: Harkamal Walia, [hwalia2@unl.edu](mailto:hwalia2@unl.edu) and Zvi Peleg, [zvi.peleg@mail.huji.ac.il](mailto:zvi.peleg@mail.huji.ac.il)

1 **Abstract**

2 Sustaining wheat (*Triticum* sp.) production during the predicted climatic variability is a major  
3 issue for global food security. Wild emmer wheat (*T. turgidum* ssp. *dicoccoides*), the direct  
4 progenitor of domesticated wheats is native to semi-arid environments and may offer a novel  
5 source of allelic repertoire for enhancing water stress adaptation dynamics. We explored this  
6 idea by examining the phenotypic consequence of a series of wild emmer (*acc.* Zavitan)  
7 chromatin introgressions into an elite durum wheat (*cv.* Svevo) on water stress adaptation. Wild  
8 emmer chromatin introduced divergent water stress responsiveness strategies into wheat,  
9 ranging from high plasticity to high stability for biomass accumulation that was concomitant  
10 with altered photosynthetic assimilation and water-use efficiency under water-stress conditions.  
11 We further characterize promising introgression line (IL20-2), which exhibits high plasticity  
12 during water stress. Combination of genotypic information and root transcriptome analysis  
13 highlight candidate genes that may regulate this shift in root-to-shoot biomass ratio in response  
14 to water stress. We show that introducing alien chromatin in IL20-2 is an instance for enhancing  
15 stress adaptation mechanisms that may have been lost during wheat evolution under  
16 domestication or breeding.

17

## 18 INTRODUCTION

19 Wheat (*Triticum aestivum*) is the most widely food crop in the world, providing about 20% of  
20 the total dietary calories for human diet (Brouns et al., 2019). To meet the global food demand  
21 of the rising population, it is estimated that at least 60% increase in the wheat production is  
22 needed by 2050 (Myers et al., 2017). This yield increase needs to be accomplished even as  
23 agricultural land is lost to urbanization, industrialization, desertification and climate change that  
24 resulting in increased frequency of extreme temperature and precipitation events (Rojas et al.,  
25 2019). In the past century, wheat grain yields increment has been largely associated with  
26 improved agronomic practices, and genetic enhancements. Developing wheat cultivars with  
27 increased biomass accumulation and enhance water-use efficiency under water stress, is one of  
28 the core challenges in achieving sustainable global food security. Thus, identification of novel  
29 water stress adaptations and their underline mechanisms, will serve as promising genetic  
30 resources for breeding.

31 Plants evolved a suite of adaptive responses to cope with water stress at the molecular,  
32 cellular, anatomical, morphological and whole-plant physiological levels (Gupta et al., 2020).  
33 These responses can be categorized into three broad types: escape, dehydration avoidance and  
34 tolerance. Escape relies on successful completion of reproduction cycle before the onset water  
35 stress, achieved by early flowering and/or short growth duration (i.e., developmental plasticity;  
36 Kooyers, 2015). Dehydration avoidance is defined as a plant's ability to maintain water  
37 potential above a critical threshold in response to water stress (Blum, 1988). This strategy  
38 depends on minimizing water loss by reducing transpiration and thus enhancing water-use  
39 efficiency. This approach can be achieved by decreasing leaf area and increasing root-to-shoot  
40 ratio, or a combination thereof (Araus et al., 2002). Dehydration tolerance is the ability of plants  
41 to maintain metabolic activity under low water potential. This is typically coordinated via  
42 physiological and biochemical alterations (e.g., osmoregulation) at the cellular and molecular  
43 levels (Robbins and Dinneny, 2015), that can be considered as phenotypic plasticity. The ability  
44 of an individual to alter its form or function in response to environmental cues, i.e., phenotypic  
45 plasticity, plays a key role in adaptation to varying environments (Bradshaw, 1965). Phenotypic  
46 plasticity is associated with the developmental rhythm (e.g., germination, plant architecture and  
47 size, flowering and maturation timing) and highly affecting plants relative fitness. Plasticity in  
48 root system architecture, a tissue that senses water stress early, can contribute to maintenance  
49 of water potential for a longer duration by shifting more resources to the roots.

50 The temporal aspect of plant responses to stress is especially pertinent for water stress  
51 responses, as it involves a concomitant change in soil water status along with the physiological

52 and molecular responses of the plant. Elucidating the underlying genetic basis of phenotypic  
53 plasticity requires temporal and spatial measurement of large number of accessions, making  
54 this intractable through manual, destructive measurements. With recent advancements in high-  
55 throughput, image-based phenotyping platforms, it is becoming more feasible to combine high  
56 temporal and spatial resolution phenotyping for linking adaptive responses to underlying allelic  
57 variation across populations (Yang et al., 2020). Our ability to identify novel phenotypic  
58 responses, for instance under water-limiting environment is not only dependent on technologies  
59 to detect these plastic responses but also on the level of phenotypic variation present within the  
60 population being examined. The range of phenotypic variation within a background or  
61 population can be enhanced significantly by incorporating chromatin from wild or related  
62 species as introgression and translocation lines, such as in tomato (*Solanum lycopersicum*;  
63 Arms et al., 2015), barley (*Hordeum vulgare*; Baum et al., 2003) and rice (*Oryza sativa*;  
64 Tsujimura et al., 2019).

65 Wild emmer wheat [*T. turgidum* ssp. *dicoccoides* (Körn.) Thell.] is the direct  
66 allotetraploid ( $2n = 4x = 28$ ; genome BBAA) progenitor of all domesticated wheats. Wild  
67 emmer thrives across the Near Eastern Fertile Crescent in a wide eco-geographic amplitude and  
68 harbors a rich allelic repertoire for numerous agronomic traits, including drought tolerance  
69 (Peleg et al., 2005). Introgression of wild emmer alleles has been shown to impact wheat  
70 adaptation to water stress, by modification of various traits such as root architecture (Golan et  
71 al. 2018; Merchuk-Ovnat et al., 2017), and flower fertility (Golan et al., 2019). Here, we used  
72 a new set of wild emmer introgression lines (ILs) in an elite tetraploid wheat background to  
73 discover novel phenotypic responses to water stress, with emphasis on the temporal scale by  
74 capturing the plant longitudinal nature dynamics. We identified a subset of lines with distinct  
75 water stress responses and characterized representative ILs for physiological responses.  
76 Molecular analysis of one of the ILs exhibiting a change in root-shoot ratio in response to water-  
77 stress yielded candidate genes localizing to the introgression of wild emmer chromatin. Overall,  
78 this study shade new light on the potential of wild introgressions to promote various water stress  
79 responsiveness dynamics, as well as characterization of water stress adaptive mechanism that  
80 can serve as basis for future climate resilience wheat breeding programs.

81

## 82 **RESULTS**

### 83 **Wild emmer introgressions confer divergent water stress responses**

84 We hypothesized that introducing a series of wild emmer introgressions in an elite durum wheat  
85 cultivar could increase the range of phenotypic responses to water stress, without significantly  
86 compromising its desirable agronomic traits. The assumption being that introgression of small  
87 wild emmer genomic portion is sufficient to alter the domesticated wheat water stress response.  
88 To address this question, we selected a subset of 47 wild emmer introgression lines (ILs) in the  
89 background of elite durum wheat *cv.* Svevo, consists 1.3-14.2% of Zavitan genes per IL  
90 (Supplemental Table S1), to examine for their phenotypic responses to water stress. We applied  
91 a non-destructive, image-based phenotyping approach to compare the temporal shoot growth  
92 under well-watered (WW; 80% field capacity) and water-limited (WL; 30% field capacity)  
93 treatments. Five side view images were used to obtaining the pixel counts as an estimate for  
94 daily shoot biomass accumulation as described before (Knecht et al., 2016). In general, the  
95 growth curves for Svevo were similar to the median response of all ILs collectively during the  
96 course of the experiment, suggesting that ILs biomass accumulation (projected shoot area, PSA)  
97 were segregating around Svevo performance (Fig. 1A). Notably, most of the ILs reached the  
98 target of 30% field capacity after 19 days (ranging from 14 to 24 days) whereas significant  
99 differences in biomass accumulation was detected already after 10 days (collectively), which  
100 indicate the wide strategies of responses to water stress.

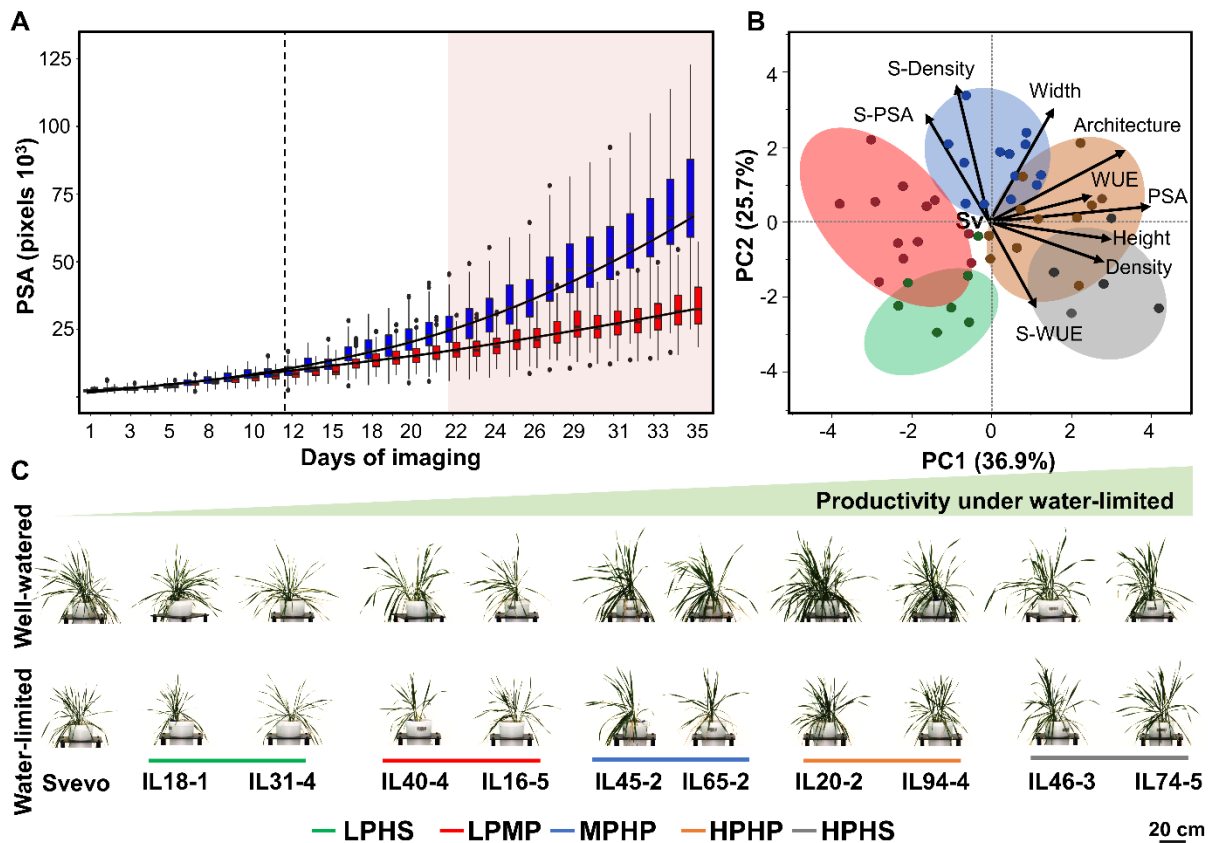

101

102 **Figure 1.** Wild introgressions promote phenotypic diversity. (A) Longitudinal dynamics of biomass accumulation  
 103 (projected shoot area; PSA) for the 47 introgression lines collectively. The parental line Svevo marked with black  
 104 solid line. (B) Principal component (PC) analysis of continuance morpho-physiological traits under WL conditions  
 105 and expressed as drought susceptibility index (S). Biplot vectors are trait factor loadings for PC1 and PC2. Water-  
 106 use efficiency (WUE), biomass accumulation (PSA), plant architecture, density, height and width, and in term of  
 107 drought susceptibility index for WUE (S-WUE), biomass accumulation (S-PSA) and density (S-density). The five  
 108 clusters of stress responsiveness: high productivity - high stability (HPHS; gray), high productivity - high plasticity  
 109 (HPHP; Orange), moderate productivity-high plasticity (MPHP; Blue), low productivity-moderate plasticity  
 110 (LPMP; Red), low productivity-high stability (LPHS; Green). (C) Representative photo of ILs from each  
 111 responsiveness cluster under contrasting water availabilities, after 35 days of imaging.

112

113 Next, we extracted some of the key morphological traits derived from RGB images  
 114 included, PSA, plant height and width, plant architecture (convex area), and plant density, and  
 115 divided PSA with total water-use to obtain water-use efficiency (WUE) at the final day of the  
 116 experiment. In order to determine the extent of phenotypic diversity for the morphological traits  
 117 introduced in the Svevo background, we plotted the density distribution of the ILs under WW  
 118 and WL treatments at the 35 d time point. The ILs exhibit a broad range for all the traits with  
 119 Svevo positioned close to the average value for most traits (Supplemental Fig. S1). This result  
 120 suggests that introgression of small pieces of chromatin from wild emmer into a wheat  
 121 background can introduce significant phenotypic diversity. While ILs panel showed strong  
 122 reduction in PSA, as indicated by the separation between WL and WW, and in 50% reduction  
 123 of Svevo. Greater phenotypic overlap between WW and WL was observed in plant width,

124 density and WUE. The phenotypic distribution for plant height among the ILs under WL  
125 treatment was wider as compared with WW treatment. Notably, the phenotypic range for WUE  
126 is much broader under WL compared to the WW conditions.

127 To better understand the relationships among the morpho-physiological traits, we  
128 performed correlation analysis between these traits at 35 d (Supplemental Fig. S2 and  
129 Supplemental Table S2). PSA was positively correlated with all morphological traits suggesting  
130 that plant biomass and architecture are tightly associated regardless of water availability. Under  
131 WL, PSA and plant density were found positively correlated with WUE, suggesting that plant  
132 architecture can affect the WUE under stress. To further explore the water stress response of  
133 these phenotypic traits, we performed principal component analysis (PCA) of the morpho-  
134 physiological traits under WL treatment as well as in relative terms (i.e., S index) (Fig. 1B).  
135 PCA extracted three major PCs (Eigen values > 1.2) accounting collectively for 76% of the  
136 phenotypic variance among the ILs (Supplemental Fig. S3). PC1 explained 36.9% of the dataset  
137 variation and loaded positively with PSA, plant height, plant architecture, WUE and plant  
138 density. PC2 explained 25.7% of the dataset variation and loaded positively with plant width,  
139 S-PSA and S-density and negatively with S-WUE. PC3 explained 13.4% of the dataset variation  
140 and loaded positively with WUE, S-PSA and plant density. To further dissect the differences  
141 in ILs water stress responsiveness, we performed hierarchical clustering analysis of the morpho-  
142 physiological traits under WL treatment and derived stress index traits (Supplemental Fig. S4).  
143 The clustering analysis resolved the ILs into five distinct clusters, which could broadly be  
144 described as following: Cluster 1 (high productivity and high stability, HPHS), Cluster 2 (high  
145 productivity and high plasticity, HPHP), Cluster 3 (moderate productivity and high plasticity,  
146 MPHP), Cluster 4 (low productivity and moderate plasticity, LPMP), and Cluster 5 (low  
147 productivity and high stability, LPHS). The productivity in context of this study implies  
148 biomass accumulation under WL.

149 Based on this analysis, Svevo resolved to Cluster 4 (LPMP) that characterized as low  
150 PSA and WUE, with intermediate response to water stress. The two most productive clusters  
151 (HP), Cluster 1 and Cluster 2 showed different stress response as expressed in the drought  
152 susceptibility index. Cluster 1 exhibited low S-PSA values which indicate lower change  
153 between WW and WL treatments. Cluster 2 showed the highest WUE under WL and relatively  
154 high values of S-PSA, resulting with a high plasticity cluster. Overall, raw images of  
155 representative plants from the five responsiveness clusters under both water treatments can  
156 demonstrate the different stress responsiveness clusters (Fig. 1C).

157

## 158 **Water stress responsiveness classification based on temporal growth dynamics**

159 Although the clustering analysis using endpoint measurements of the ILs provide a useful  
160 perspective, the temporal dynamics for these traits that precede these phenotypic outcomes can  
161 elucidate the responsiveness to water stress. To address this, we mapped the overall trajectories  
162 and phenotypic distributions of these traits on a weekly scale (Fig. 2A). In general, all clusters  
163 exhibited higher biomass accumulation and higher coefficient of variance (CV) under WW as  
164 compared with WL treatment (Supplemental Table S3). The PSA distributions under WW and  
165 WL treatments show that the high stability (HS) clusters exhibited substantial overlap between  
166 the WW and WL curves in weeks 5 and 6. The point of significant response to water stress,  
167 determined as three continuous days of significant ( $P \leq 0.05$ ) difference in growth between  
168 treatments, ranged between 10 days (HPHP cluster) to 26 days (HPHS cluster) (Fig. 2A;  
169 Supplemental Table S4). A similar pattern was found for plant architecture and density  
170 (Supplemental Fig. S5). The parental line (Svevo; LPMP cluster) expressed an intermediate  
171 response (17, 18 and 15 days for PSA, plant architecture and density, respectively;  
172 Supplemental Fig. S5). Although, MPHP cluster exhibits high biomass accumulation under  
173 WW treatment, it was labeled as moderate productivity (MP) based on its performance under  
174 WL treatment. The clusters classification to productivity (i.e., HP, MP and LP) were found  
175 significantly different from each other ( $P < 10^{-4}$ ) under WL.

176

## 177 **Plant responsiveness clusters expressed in heritability dynamics**

178 To dissect the genetic (G) and environmental (E) components of PSA, underlying each  
179 responsiveness cluster through developmental stages, we calculated broad-sense heritability  
180 and its components. The HPHS cluster exhibited the highest genetic component ( $\sigma^2_G$ ),  
181 which increased with progression of water stress duration (Fig. 2B). On the other hand, HPHP  
182 and MPHP clusters, had lower genetic components and the highest G×E interaction ( $\sigma^2_{G \times E}$ )  
183 ( $G \times E$ ) (Fig. 2B, C). The broad-sense heritability dynamics ( $_{bs}h^2$ ) of PSA showed clear separation  
184 into stability (LPHS and HPHS) and plasticity (LPMP, MPHP, and HPHP) (Fig. 2D). In  
185 general, the level of PSA  $_{bs}h^2$  decreased over time. Heritability dynamics of plant density  
186 showed a strong genetic component for HPHP and a high environmental effect for LPMP that  
187 increased over time. Plant architecture presented a high environmental effect on MPHP, causing  
188 low  $_{bs}h^2$  for this cluster (Supplemental Fig. S6). Overall, the heritability dynamics of the  
189 responsiveness cluster emphasize that stability and plasticity derived from both genetic and  
190 environmental effect that can be phenotype and genetically controlled.

191



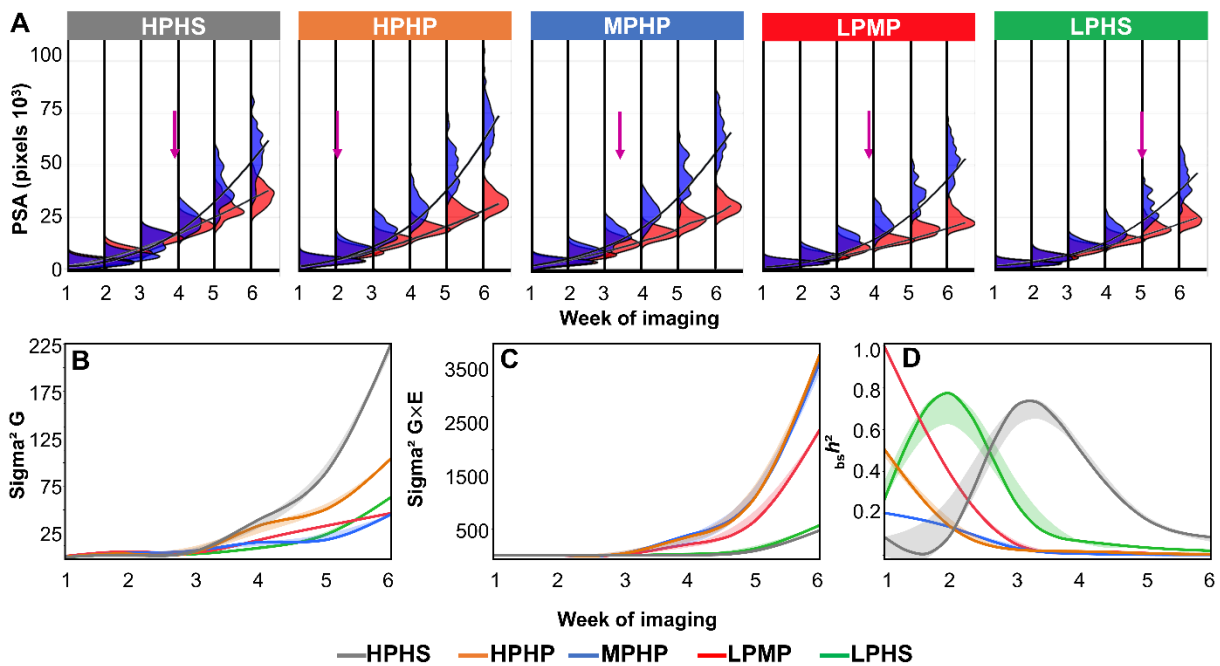

192

193 **Figure 2.** Longitudinal dynamics of the five responsiveness clusters. (A) Longitudinal frequency distribution of  
 194 biomass accumulation (projected shoot area; PSA) of each responsiveness cluster under well-watered (WW; blue)  
 195 and water-limited (WL; red) treatments. The five clusters of stress responsiveness: high productivity - high stability  
 196 (HPHS; gray), high productivity - high plasticity (HPHP; Orange), moderate productivity-high plasticity (MPHP;  
 197 Blue), low productivity-moderate plasticity (LPMP; Red), low productivity-high stability (LPHS; Green). The  
 198 point of significant ( $P \leq 0.05$ ) response to water stress is marked above with arrow. Longitudinal heritability  
 199 components of (B) genetic ( $\text{Sigma}^2 G$ ), (C) environmental interaction ( $\text{Sigma}^2 G \times E$ ), and (D) broad sense  
 200 heritability ( $_{bs}h^2$ ).  
 201

## 202 **IL20-2 exhibited higher assimilation rate under water-limited conditions**

203 Although the ILs were broadly categorized into five distinct clusters, given the focus of this  
 204 work on phenotypic plasticity in response to water stress, we decided to compare the two high  
 205 productivity clusters HPHP and HPHS, represented by IL20-2 and IL46-3, respectively, for  
 206 downstream physiological experimentation and analysis. We targeted the temporal window  
 207 during the early stages of previous experiment so that we can characterize the initial phase of  
 208 separation in growth rate and water stress response. Under WL treatment, the relative growth  
 209 rate dynamics demonstrated the advantage of the two productive clusters (linear equation slope  
 210 369.0 and 679.1 for IL20-2 and 46-3, respectively) compared to Svevo (302.5) (Fig. 3A;  
 211 Supplemental Table S5). While IL46-3 maintained a similar linear equation slope under both  
 212 water treatments, IL20-2 exhibited a stronger change in regression pattern (854.9 vs. 369.0 for  
 213 WW and WL, respectively; Fig. 3A) confirming its high plasticity in response to water stress.  
 214 In general, assimilation rate (A) dynamics declined with the progression of water stress. Svevo  
 215 exhibited the highest reduction (34.9%), whereas the high stability IL46-3 had only 13.1%  
 216 reduction (Fig. 3B). Notably, IL20-2 exhibited the highest assimilation rate under WW  
 217 treatment over time ( $29.68 \mu\text{mol m}^{-2} \text{s}^{-1}$ ), whereas under WL both IL46-3 and IL20-2 exhibited

218 similar A (23.49 and 23.28  $\mu\text{mol m}^{-2} \text{s}^{-1}$ , respectively) which was significantly higher than  
219 Svevo ( $P=0.03$ ). In addition, IL20-2 exhibited significantly higher ( $P=0.046$ ) stomatal  
220 conductance ( $g_s$ ) under WL as compared with Svevo at the last day of measurements (0.33 vs.  
221 0.20  $\text{mol m}^{-2} \text{s}^{-1}$ , respectively; Fig. 3C). Under WW, IL20-2 exhibited the highest transpiration  
222 rate (E), whereas all three lines had similar transpiration rates under WL. This pattern fits into  
223 IL20-2 HPHP pattern that keeps high biomass accumulation and strong phenotypic response to  
224 water stress. (Supplemental Fig.S7; Supplemental Table S6).

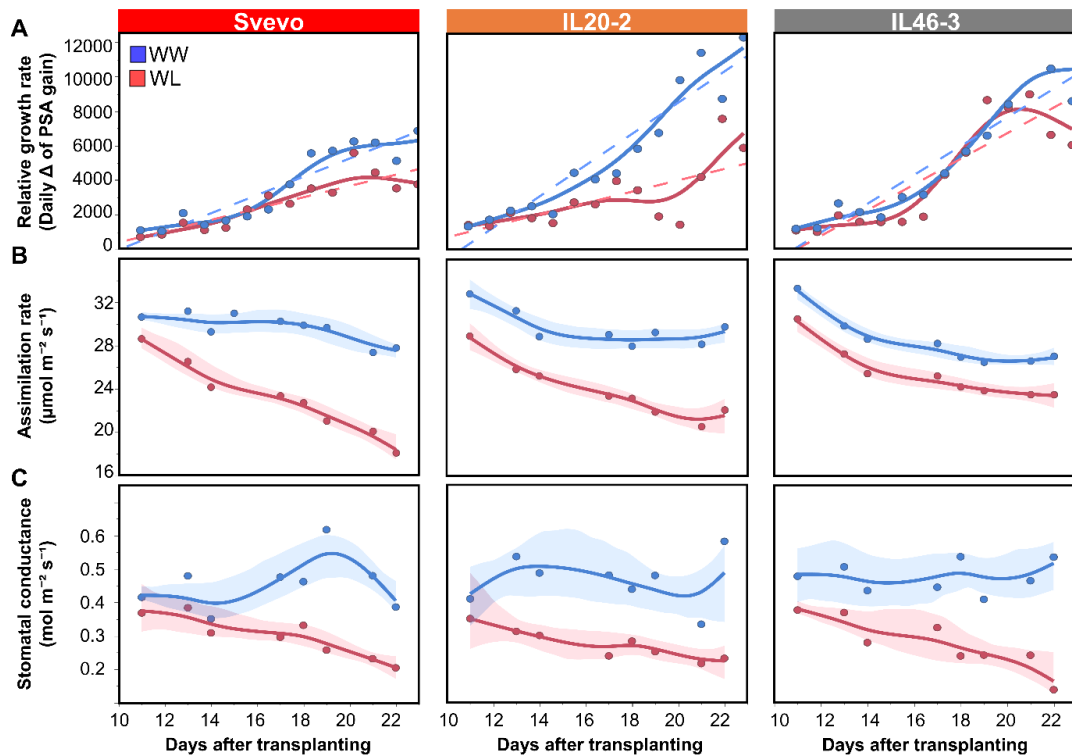

225  
226 **Figure 3.** Longitudinal dynamics of Svevo, IL20-2 and IL46-3 for (A) relative growth rate, (B) net assimilation  
227 rate and (C) stomatal conductance under well-watered (WW; blue) and water-limited (WL; red) treatments.  
228

### 229 IL20-2 exhibits higher root-to-shoot ratio under water stress

230 To test if better water capture involves in the physiological advantage of IL20-2 higher gas  
231 exchange and growth rate under WL, we targeted the root system (Fig. 4A). We measured root  
232 dry weights from soil grown 21 d old plants and found that both IL46-3 and IL20-2 had higher  
233 root biomass relative to Svevo ( $P \leq 0.001$ ) under WW treatment. However, under WL treatment,  
234 IL20-2 root biomass increased significantly compared to Svevo ( $P=0.003$ ). Further, IL20-2 also  
235 exhibits higher root-to-shoot ratio when compared with Svevo under WL conditions ( $P=0.046$ )  
236 (Fig. 4B, C; Supplemental Table S7). This data suggests that IL20-2 does have a root response  
237 to water stress that is divergent from Svevo under water stress. To explore this differential root  
238 response on a temporal scale, we performed a seedling stage assays using paper roll set-up and  
239 collected root samples for RNA sequencing. While the shoot length of IL20-2 and Svevo was

240 similar under WW and WL treatments, IL20-2 exhibited significantly higher root length  
 241 throughout the experiment, with 10.3% longer roots at the last day of the experiment (25.21 vs.  
 242 22.85 cm, for IL20-2 and Svevo, respectively;  $P=0.006$ ) under WL. This advantage expressed  
 243 in the higher (12.5%) root-to-shoot ratio of IL20-2 compared with Svevo at the last day ( $P=0.001$ ;  
 244 Supplemental Fig. S8 A-F). This suggested that root growth dynamic of IL20-2 are different  
 245 from Svevo even during early seedling stage and more apparent under WL treatment with a  
 246 significant effect of increasing the root-to-shoot ratio. Importantly, our results show that root  
 247 biomass in later stages and root length at seedling stage showed similar trend of advantage in  
 248 IL20-2 under WL treatment (Fig. 4, Supplemental Fig. S8).  
 249

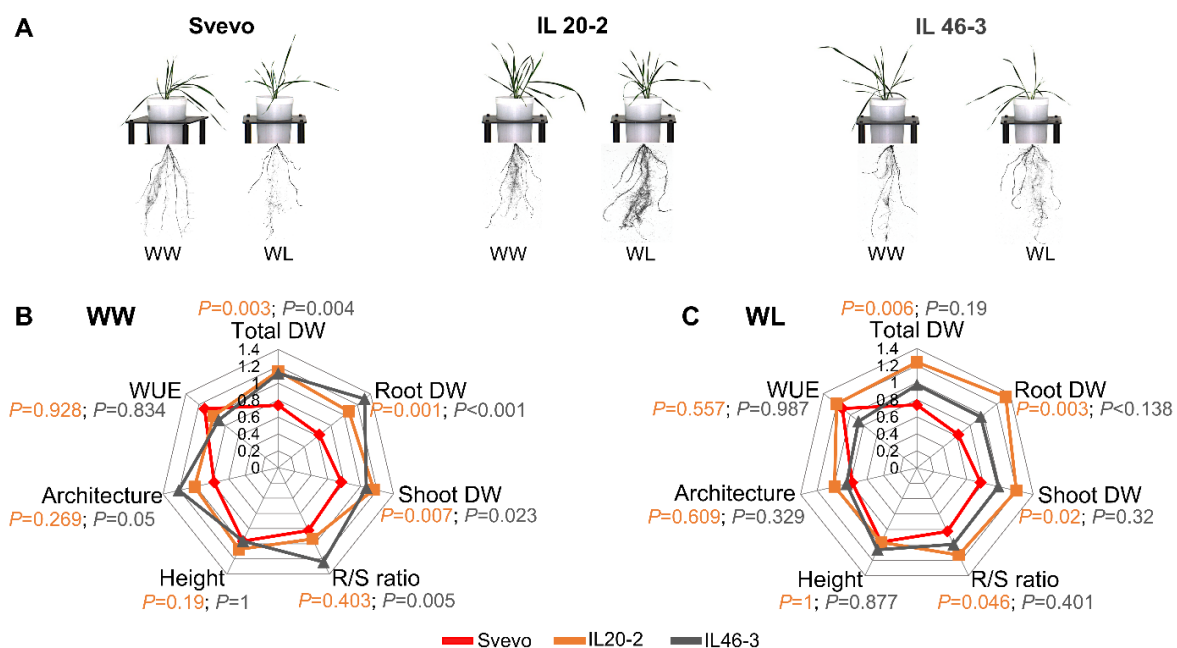

250  
 251 **Figure 4.** Morpho-physiological modification in response to water stress. (A) Representative photo of Svevo,  
 252 IL20-2 and IL46-3 under well-watered (WW) and water-limited (WL) treatments. Photo taken 14 days after  
 253 transplanting. Radar charts comparing the phenotypic traits of Svevo (red), IL20-2 (orange) and IL46-3 (gray)  
 254 plants under (B) WW and (C) WL treatments. Values are means ( $n=4$ ). Total dry weight (Total DW), water-use  
 255 efficiency (WUE), plant architecture (convex area), plant height (Height), root-to-shoot ratio (R/S ratio), shoot  
 256 DW and root DW.  
 257

### 258 IL20-2 wild introgressions exhibit higher DEG frequency as expressed in water response

259 Given the differential root growth and root-to-shoot ratio between Svevo and IL20-2 in the  
 260 seedling stage, we reasoned that the underlying gene(s) responsible for these phenotypes could  
 261 be the same that resulted in similar root-to-shoot ratio plasticity observed in later vegetative  
 262 stages. Therefore, we performed transcriptome analysis on roots from seedling stage  
 263 experiment with the goal of identifying candidate genes that underlie the root-to-shoot plasticity  
 264 phenotype. Seedling roots sampling for transcriptome is more precise as it prevents root damage

265 that occurs with sampling roots from older plants growing in soil or sand. We combined the  
 266 transcriptomics with high-density genotypic data of IL20-2 and Svevo to map the differentially  
 267 expressed genes (DEGs) to specific introgressions. IL20-2 has three introgressions from  
 268 Zavitan, the wild emmer parent, on chromosomes 2A (3.7 Mbp), 4A (23 Mbp) and 5B (6.7  
 269 Mbp), accounting for ~0.33% of the tetraploid durum wheat genome (Maccaferri et al., 2019).  
 270 Based on public annotations, a total of 651 genes (73, 503 and 75, respectively; Avni et al.,  
 271 2017; Supplemental Table S8) map to these introgressions. Under water-limited, when the root  
 272 phenotype is most apparent, we identified 599 DEGs (Fig. 5A) between Svevo and IL20-2, with  
 273 37 genes (6.17%) co-localizing to the introgressions.  
 274

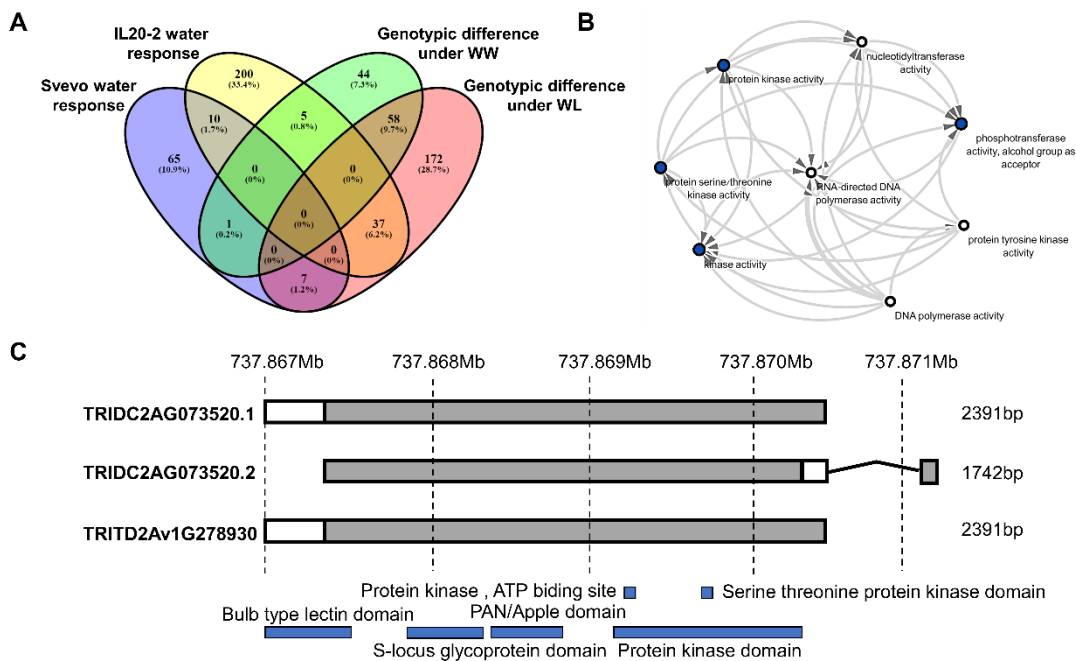

275  
 276 **Figure 5.** Differently expressed genes (DEGs) dynamics. **(A)** A four-way Venn diagram of DEGs among IL20-2  
 277 and Svevo under well-watered (WW) and water-limited (WL) treatments. **(B)** Network expression pattern of the  
 278 DEGs associated with kinase activity. Node with blue color represent high interaction. **(C)** Splice variation of  
 279 TRIDC2AG073520 gene.  
 280

281 Of these, 425 genes were down-regulated and 174 genes were up-regulated in IL20-2  
 282 (Supplementary Table S9). Under WL treatment, 39.23% of the DEGs were differently  
 283 expressed between Svevo and IL20-2 (56 up- and 179 down-regulated), whereas only 11.35%  
 284 were expressed differently under WW treatment. Gene Ontology (GO) analysis revealed three  
 285 main biological processes: metabolic processes (GO:0008152;  $P < 10^{-4}$ ), localization  
 286 (GO:0051179;  $P < 10^{-4}$ ) and response to stimulus (GO:0050896;  $P < 10^{-4}$ ) (Supplemental Fig.  
 287 S9A). The molecular functions were associated with antioxidant activity (GO:0016209;  $P < 10^{-4}$ ),  
 288 catalytic activity (GO:0003824;  $P < 10^{-4}$ ), transporter activity (GO:0005215;  $P < 10^{-4}$ ) and  
 289 transferase activity (GO:0016740;  $P < 10^{-4}$ ) (Supplemental Fig. S9B).

## 290 **Candidate genes associated with longer roots under water stress**

291 To examine if the root plasticity trait of IL20-2 could be due to differentially abundant  
292 transcript(s) that localize to the introgression, we filtered for these DEGs and identified 17  
293 DEGs under WW and 18 DEGs under WL treatments between IL20-2 and Svevo. Two DEGs  
294 (TRIDC4AG049220 and TRIDC4AG049940) were found to express uniquely in IL20-2 in  
295 response to water stress. To find the causal genes associated with the IL20-2 root phenotype,  
296 we targeted root-related DEGs, which resulted in five candidate genes (CG; Supplementary  
297 Table S10). The criteria used to filter for these five genes are based literature searches of  
298 orthologs with root associated phenotypes. Three of these genes were up-regulated in IL20-2  
299 under WL (TRIDC4AG046080, TRIDC4AG048600 and TRIDC2AG073520), one gene was  
300 down-regulated under WL (TRIDC4AG046660) and one gene (TRIDC4AG046110) showed  
301 up-regulation under WW treatment only. Of these five genes, TRIDC4AG046080 is low  
302 confidence gene based on annotation of the Zavitan genome. The other four genes carried  
303 mutations or did not found in the domesticated allele compared with the wild emmer  
304 (Supplementary Table S10).

305 TRIDC4AG046110 is a *FAR1-RELATED SEQUENCE 4-like* isoform that was shown to  
306 be down-regulated in salt-susceptible sweet sorghum (*Sorghum bicolor*) roots (Yang et al.,  
307 2018). TRIDC4AG048600 is a *SIMILAR TO RCD ONE 1 (SRO1)* gene. In *Arabidopsis*  
308 (*Arabidopsis thaliana*), a double mutant of *AtSRO1* exhibited shorter roots and a smaller cell  
309 division zone as compared with wild-type plants (Teotia and Lamb, 2011). A sequence  
310 alignment of this gene against the Zavitan genome indicates a truncated protein in the Zavitan  
311 genome that may result in loss of function or a modified function.

312 The remaining three DEGs were associated with protein kinase function (Supplementary  
313 Table S10), were network analysis of molecular functions showed significance of downstream  
314 transferase activity elements in various kinase activities (Fig. 5B). In details,  
315 TRIDC4AG046080 is a homologue of a rice domain of unknown function (*DUF581*) that, in  
316 *Arabidopsis*, was found to play a role in sucrose non-fermenting-related kinase (*SnRK1*)  
317 (Nietzsche et al., 2016). TRIDC4AG046660 is a Leucine-rich repeat receptor protein kinase  
318 (LRR-RLK) and TRIDC2AG073520 is a G-type lectin S-receptor-like serine/threonine-protein  
319 kinase (RLK). We examined sequence of TRIDC2AG073520 in the Zavitan genome (Avni et  
320 al., 2017) and identified two splice variants on chromosome 2A, which are 2391bp and 1742bp  
321 for TRIDC2AG073520.1 and TRIDC2AG073520.2, respectively. In contrast, only a single  
322 variant (2391bp) was found in the tetraploid durum wheat (*cv.* Svevo) and hexaploid bread  
323 wheat (*cv.* Chinese Spring; Appels et al., 2018) genomes (Fig. 5C). This CG was mapped in

324 the expression atlas of *Zavitan* to root tissue- specific gene and enforce our hypothesis of this  
325 CG as the main candidate (Supplemental Fig. S10).

326

327

## 328 **DISCUSSION**

329 Wild plants developed various reversible and non-reversible phenotypic plasticity strategies to  
330 cope with environmental uncertainty. In contrast, man-made selection under optimal  
331 environmental conditions resulted in higher crop-plants phenotypic stability (Reynolds et al.,  
332 2007; Placido et al., 2013; Lopes et al., 2015). As a consequence, many of the modern cultivars  
333 may not fit for the projected climate change scenarios in many regions (Kissoudis et al., 2016).  
334 Wild ancestors of modern crop-plants offer promising source for genetic diversity and novel  
335 drought adaptive traits yet to be exploited. Here, we used a set of wild emmer introgression  
336 lines to study their dynamic responsiveness to water stress and its underlying genetic  
337 mechanisms.

338 The introgression of *Zavitan* alleles into modern durum cultivar promoted higher  
339 phenotypic diversity under both WW and WL treatments, as expressed in plant architecture and  
340 biomass accumulation (Fig. 1). While the IL panel was developed from single wild emmer  
341 accession (*Zavitan*), it resulted in wide segregation of morpho-physiological traits (either  
342 positively or negatively). This accession originated from habitat with high soil moisture  
343 fluctuations, due to shallow brown basaltic soil type, that have been show to promote diversity  
344 (Poot and Lambers, 2008; Peleg et al., 2008). This phenotypic variation is associated with the  
345 quantitative nature of these traits and the different combinations of wild and domesticated  
346 alleles. Interestingly, the mean biomass accumulation trajectory over time of the IL panel was  
347 similar to Svevo under both water treatments.

348 Water stress reduced about 50% of biomass (i.e., PSA) and altered plant architecture (i.e.,  
349 convex area 12.5-48.5%) relatively to the WW treatment (Supplementary Fig. S1), with both  
350 variables being positively associated with one another (Supplementary Fig. S2). Increased  
351 phenotypic variation in response to water stress was quantified by the calculation of drought  
352 susceptibility index (S-index). The combination of IL performance under WL with their S-  
353 indexes resulted in five distinct clusters of high phenotypic stability (HPS, LPS) and  
354 phenotypic plasticity (HPP, MPP, LPP). Phenotypic stability is often associated with  
355 small changes in plant performance in response to unfavorable conditions. Escape, i.e., rapid  
356 growth to avoid the stress, is a common strategy of wild plants in xeric habitats, and has been  
357 repeatedly reported for many wild grasses such as wild emmer wheat (Peleg et al., 2005),

358 *Brachypodium distachyon* (Opanowicz et al., 2008), and *Avena barbata* (Sherrard and  
359 Maherali, 2006). Accordingly, the two clusters exhibiting phenotypic stability had biomass  
360 reductions of only 45 and 40% for LPHS and HPHS, respectively. Interestingly, the LPHS had  
361 characteristics of “small plants” (PSA, 50.4 and 27.8 kPixel for WW and WL, respectively),  
362 whereas HPHS had high biomass under WW and the highest values among all clusters under  
363 WL (67.1 and 40.6 kPixel, respectively). These results suggest that phenotypic stability strategy  
364 is not size-dependent, but rather an active mechanism that enables plants to cope with water  
365 stress.

366 Wild emmer wheat populations were found to harbor rich phenotypic diversity for  
367 drought-adaptive traits, which correspond with the wide inter-annual and seasonal fluctuations  
368 in soil moisture availability of the Mediterranean basin (Peleg et al., 2005). Accordingly, the  
369 phenotypic plasticity clusters exhibited high reduction in biomass accumulation (55 and 56%  
370 for MPHP and HPHP, respectively). The HPHP cluster had the highest biomass under WW  
371 (PSA 81.8 kPixel); while under WL it exhibits high reduction, biomass was still relatively high  
372 (36.4 kPixel) compare to all clusters.

373 Plant acclimation to water stress elicited physiological, morphological and metabolic  
374 responses that occurred through coordinated spatio-temporal processes. These processes  
375 changed the physiological status of plants toward a new steady-state level that supported growth  
376 and fitness under unfavorable conditions. Time-course characterization of the responsiveness  
377 clusters showed that phenotypic plasticity clusters responded earlier (12, 8 and 10 kPixel for  
378 LPMP, MPHP and HPHP, respectively), then stability clusters (20 and 26 kPixel for LPHS and  
379 HPHS, respectively) (Fig. 2A). In order to understand the longitudinal genetic architecture of  
380 the responsiveness clusters, we calculated broad sense heritability ( $_{bs}h^2$ ) dynamics. While the  
381 plasticity clusters exhibited a decrease in PSA  $_{bs}h^2$  over time as a consequence of high G×E  
382 interaction ( $\text{Sigma}^2 \text{G} \times \text{E}$ ) and low genetic component ( $\text{Sigma}^2 \text{G}$ ), the stability clusters showed  
383 increased heritability during early growth and decreased heritability at later stages, which  
384 corresponds to the late stress responses (Fig. 3).

385 Plants exhibit morphological and physiological adjustments to maintain water status and  
386 carbon assimilation under water stress (Chaves et al., 2009). The two high productivity clusters  
387 (i.e., HPHS and HPHP) exhibited contrasting response mechanisms, with the plasticity cluster  
388 responding earlier ( $\Delta 16$ ,  $\Delta 17$  and  $\Delta 8$  days, for PSA, plant density and plant architecture,  
389 respectively; Fig. 2; Supplementary Fig. S5). Detailed characterization of these two clusters  
390 (represented by IL20-2 and IL46-3 for HPHP and HPHS, respectively) confirmed the earlier  
391 response of HPHP in terms of relative growth rate (Fig. 3A), thus suggesting a non-size

392 dependent plant responsiveness to water stress. In agreement, while IL46-3 maintained similar  
393 photosynthetic and transpiration rates under WW and WL, IL20-2 responded as early as day  
394 12, limiting its assimilation rate. Notably, IL20-2 had the highest photosynthetic rate under  
395 WW and exhibited the larger reduction under WL; yet, it was still significantly better than  
396 Svevo.

397 A fast stress responsiveness strategy may negatively affect carbon assimilation and  
398 growth; on the other hand, early acclimation can trigger a metabolic shift of carbon allocation  
399 to different plant organs (Rodrigues et al., 1993; Bohnert and Sheveleva, 1998). Thus, under  
400 limited water availability root-to-shoot ratio plasticity can mediate optimal resource  
401 partitioning between growth and development (Shiple and Meziane, 2002; Voss-Fels et al.,  
402 2018). Modern bread wheat cultivars have lower root-to-shoot ratios as compared with old  
403 traditional cultivars (landraces) (Siddique et al., 1990). Moreover, a comparison among wild  
404 emmer, domesticated emmer and durum wheat showed a trend of reduced root-to-shoot during  
405 the initial domestication from wild to domesticated emmer, and during wheat evolution under  
406 domestication (Gioia et al., 2015; Roucou et al., 2018). Accordingly, the introgression of alleles  
407 from Zavitan in the background of the elite durum wheat cultivar significantly increased the  
408 root-to-shoot ratio (30%) under WL as compared with the parental line (Fig. 4C). Likewise,  
409 Merchuk-Ovnat et al. (2017) reported higher root-to shoot ratio in response to water stress from  
410 wild emmer (acc. G18-16) introgression in background of elite bread wheat cultivar. Thus,  
411 introducing new genetic diversity for root-to-shoot ratio plasticity from wild progenitors will  
412 facilitate resilience of modern wheat cultivars to the projected fluctuating water availability  
413 during the growing season.

414 The root system is the site of interactions with the rhizosphere; thus, root architectural  
415 plasticity (i.e., allocational, morphological, anatomical, or developmental) is critical adaptation  
416 strategy to environmental cues (Rellán-Álvarez et al., 2016; Golan et al., 2018). To better  
417 understand the genetic mechanism associated with the increased root biomass of IL20-2, we  
418 analyzed transcriptional patterns of roots under water stress. In general, transcriptional  
419 modifications of IL20-2 in response to water stress were significantly greater than Svevo (223  
420 vs. 73 DEGs, respectively). Likewise miRNA expression in the roots of two wild emmer  
421 accessions (TR39477 and TTD-22) were significantly higher compared with domesticated  
422 durum wheat (*cv.* Kızıltan) under water stress (Akpınar et al., 2015). These results emphasize  
423 the potential of higher plasticity in wild relatives as compared to the domesticated gene pool.

424 Downstream gene network analysis highlighted the key role of protein kinases as hubs of  
425 interaction (Fig. 5B). Three CGs (TRIDC4AG046080, TRIDC2AG073520 and



426 TRIDC4AG046660) were found associated with protein kinase function that mediates plant  
427 hormone and nutrient signaling, and cell cycle regulation (Laurie and Halford, 2001; Virlet et  
428 al., 2017). TRIDC4AG046660 is a leucine-rich repeat receptor-like protein kinase (LRR-RLK).  
429 Mutants of this gene in *Arabidopsis* (*At2g33170*) control root growth and are mediated by  
430 cytokinin (Colette et al., 2011). TRIDC4AG046080 (DUF581 in rice) interact with *SnRK1* and  
431 regulated by hormones and differentially regulated by hormones and environmental signals  
432 (Nietzsche et al., 2016). Wheat mutants containing a conserved DUF581 domain revealed a  
433 salt-induced gene (TaSRHP). Over-expression of this gene in wild-type *Arabidopsis thaliana*  
434 cv. Columbia resulted in enhanced resistance to both salt and drought stresses (Hou et al., 2013).

435 TRIDC2AG073520 (TRITD2Av1G27893 in Svevo) is a G-type lectin S-receptor-like  
436 serine/threonine-protein kinase gene. The domesticated allele contains a nonsynonymous  
437 mutation expressed as an amino acid shift (isoleucine to threonine). This CG was significantly  
438 up-regulated under WL in IL20-2 (FC 2.29,  $P_{adj}=0.03$ ). In *Arabidopsis*, drought and salinity  
439 stresses induced up-regulation of the gene (Sun et al., 2013). Moreover, the gene expressed  
440 specifically in root tissue, from early seedling stage to 50% of ear emergence (Supplemental  
441 Fig. S11;(Ramírez-González et al., 2018). Genetic dissection showed that the genomic region  
442 of this gene overlaps with a QTL affecting lateral root number per primary root (Maccaferri et  
443 al., 2016).

444 Two splice variance of TRITD2Av1G278930 were identified in the wild emmer genome  
445 (TRIDC2AG073520.1 and TRIDC2AG073520.2) included several mutations in each variant.  
446 The TRIDC2AG073520.1 variant is similar to the domesticated variant, although it contains a  
447 nonsynonymous SNP. The TRIDC2AG073520.2 variant is different in length and exon  
448 number; however, the domains remain similar to the domesticated variant and the extra exon is  
449 not characterized with a specific domain (Fig. 5C). The underline mechanisms by which the  
450 identified splice variance and/or amino acid substitution affect wild emmer response to stress  
451 via longer root systems is yet to be discovered.

452

### 453 **Concluding remarks and future perspective**

454 The current study targeted "lost alleles" from wild progenitor of wheat to understand their  
455 contribution to water stress response mechanisms. *In-depth* physiological characterization,  
456 high-throughput phenomics and functional genetics approaches revealed unique spatio-  
457 temporal water stress responsiveness dynamics strategies. Further characterization should  
458 emphasize the key role for modification of root-to-shoot ratio in response to stress as an  
459 adaptive trait. Our results suggest that re-introducing the wild genetic repertoire can enable

460 greater phenotypic plasticity and promote better resilience to anticipated unpredictable climatic  
461 conditions.

462

463

## 464 **MATERIAL AND METHODES**

### 465 **Plant material and experimental design**

466 Uniform seeds of 47 wild emmer wheat (*acc.* Zavitan) introgression lines (IL) in the  
467 background of elite durum wheat (*cv.* Svevo) and their recurrent parent were used for the current  
468 study. Detailed information for the ILs panel is provided in Supplementary Table S1. Seeds  
469 were surface disinfected (1% sodium hypochloric acid for 30 minutes) and placed in petri dishes  
470 on moist germination paper (Anchor Paper Co., St. Paul, MN, USA) about 3 cm apart, at 24°C  
471 in the dark for 5 days. Three uniform seedlings from each line were transplanted to a single pot  
472 (2L, 45×19.5cm) filled with 1.2 kg of Fafard germination soil (Sungro, Massachusetts, USA),  
473 with osmocote fertilizer and Micromax micronutrients. Six days after transplanting (DAT),  
474 plants were thinned to one plant per pot. Pots were placed on automated carriers in the  
475 greenhouse (22/16°C day/night) and watered daily to 80% field capacity until the beginning of  
476 the experiment (11 DAT). The growth stages were tracked until the tillering stage (Zadoks stage  
477 24-29; Zadoks et al., 1974). Water stress was initiated from the first day of imaging and the WL  
478 treatment pots reached the target field capacity within 16-24 days with average of 19 days after  
479 initiation of imaging. The daytime Photosynthetic Active Radiation (PAR) was supplemented  
480 with LED red/blue light lamps, with intensity of 200  $\mu\text{mol m}^{-2} \text{s}^{-1}$ . The experiment was  
481 conducted at the Nebraska Innovation Campus greenhouse, high-throughput plant phenotyping  
482 core facilities (Scanalyzer 3D, LemnaTec GmbH, Aachen, Germany), University of Nebraska-  
483 Lincoln.

484 A two-way factorial complete randomized experimental design, with 47 ILs and the  
485 recurrent parent, Svevo, was conducted. There were two irrigation treatments: well-watered  
486 (control, WW) at 80% field capacity (FC) and water-limited (WL) at 30% FC (Supplementary  
487 Fig. 12S), with three replicates for each combination. As quality control we used empty pots,  
488 placed randomly in every second row. In total there were 296 pots. Plants were imaged daily  
489 for 35 days with visible Red, Green and Blue (RGB) camera (Basler, Ahrensburg, Germany)  
490 taking 5 side-views (rotating 72°) and a single top-view. Image size was 2454×2056 pixels.  
491 After imaging, each pot was automatically weighed and watered to meet its calculated target  
492 weight. Greenhouse temperature kept at 22/16°C (day/night) during the experiment.

493 Based on results of the first experiment, we selected two ILs (IL20-2, IL46-3) for detailed

494 physiological characterization, alongside their parental line Svevo. A two-way factorial  
495 complete random design was conducted, with three genotypes, and two irrigation treatments as  
496 described above, with four replicates for a total 24 pots. The imaging started 7 DAT and  
497 imaging continued for 14 days.

498

#### 499 **Image processing**

500 PhenoImage GUI software (<https://bit.ly/2OQzJoQ>) was used for image processing based on  
501 MATLAB (The Mathworks, Inc., Massachusetts, USA). Workflow consisted of three main  
502 steps: image cropping, plant segmentation and attribute extraction. In brief, image cropping was  
503 used to remove the frame of the chamber, followed by a background removal step based on  
504 color differences. Plant segmentation was based on filtration of pixel intensity (i.e.,  
505 distinguishing between plant and non-plant pixels). As a result, the software can give the plant  
506 dimension, pixel sum, image moment and convex area.

507

#### 508 **Morpho-physiological trait characterization**

509 *Plant height* and *plant width* were calculated from plant dimensions. *Plant architecture* (convex  
510 area) was calculated to predict plant architecture trajectory. *Density* was calculated based on  
511 the ratio between pixel sum and plant architecture. *Plant biomass* was calculated based on  
512 projected shoot area (PSA) as described by (Campbell et al., 2015). On the last day of the  
513 experiment, a subset of 19 ILs were harvested, oven dried (80°C) and weighed to obtain shoot  
514 dry weight. Correlation analysis showed high correlation between PSA and shoot dry weight  
515 ( $r=0.96$ ;  $P<10^{-4}$ ; Supplementary Fig. S13). *Relative growth rate* (RGR) was calculated by  
516 dividing daily pixel accumulation with pixel number from the previous day. Daily *water-use*  
517 *efficiency* ( $WUE_t$ ) was calculated as described by Momen et al. (2019), where (t) represents the  
518 day.

$$519 \quad WUE_t = \frac{\Delta PSA \text{ (Pixels)}}{\Delta WU \text{ (ml)}}$$

520 where  $\Delta PSA$  is the daily PSA:

$$521 \quad \Delta PSA = PSA_{t-1} - PSA_t$$

522 and  $\Delta WU$  is the daily water used:

$$523 \quad \Delta WU = \text{Pot weight}_{t-1} - \text{Pot weight}_t$$

524

525 *Photosynthetic rate*, *transpiration rate* and *stomatal conductance* were measured between 10  
526 and 22 DAT using a portable infra-red gas analyzer (LI-6800XT; Li-Cor Inc., Lincoln, NE,

527 USA). Measurements were conducted at the mid portion of the last fully expanded leaf from  
528 9:00 to 13:00 ( $n=3$ ).

529 *Root biomass* was measured at 22 DAT. Root tissue was harvested ( $n=4$ ), washed and oven  
530 dried (80°C) for 72h, and weighed to obtain root dry weight. *Root-to-shoot ratio* was calculated  
531 by dividing root dry weight with PSA (shoot biomass).

532

### 533 **Characterization of root and shoot length**

534 Uniform seeds were germinated in a petri dish on moist germination paper for 5d in the dark at  
535 22-25°C. Five seedlings of each genotype were placed on moist germination paper (25 × 38  
536 cm; Anchor Paper Co., St. Paul, MN, USA), about 5 cm apart, with the germ end facing down.  
537 The paper was covered with another sheet of moist germination paper and rolled to a final  
538 diameter of 3 cm. The bases of the rolls were placed on a 4L beaker in a darkened growth  
539 chamber at a temperature of 24C/16C, 15h/9h day/night, at 50-60% relative humidity. Two-  
540 way factorial design was used with two genotypes (IL20-2 and Svevo) and two water  
541 availabilities: WW and WL, with 8 replicates for each combination (total of 32). Eight cigar  
542 rolls were placed in a container (4 L) with 100 ml (daily) for WW, or 20 ml (without refilling)  
543 for WL. Each container was wrapped with plastic to prevent water evaporation. Shoot and root  
544 length were measured daily by scale, from 3 to 8 DAT.

545

### 546 **Statistical Analyses**

547 The JMP<sup>®</sup> ver. 14 statistical package (SAS Institute, Cary, NC, USA) was used for statistical  
548 analyses, unless otherwise specified. Longitudinal response was fitted for genotypes  
549 (collectively or separately) under each water treatment. Analysis of Variance (ANOVA) was  
550 used to assess the possible effects of genotype (G), environment (E), and G×E interactions on  
551 morpho-physiological traits of genotypes. Frequency distribution was determined for all  
552 morpho-physiological traits on the last day. Principle Component Analysis (PCA) was used to  
553 determine associations between traits. PCA was based on a correlation matrix and is presented  
554 as biplot ordinations of the ILs (PC scores). Three components were extracted using  
555 eigenvalues >1.2 to ensure meaningful implementation of the data by each factor. An  
556 agglomerative hierarchical procedure with an incremental sum of squares grouping strategy,  
557 was employed using the Ward's method (Ward 1963), for the purpose of classification. Pearson  
558 correlation for all morpho-physiological traits was conducted for each water treatment.  
559 Drought-susceptibility index (S) was calculated according to Fischer and Maurer (1978):

560 
$$S = \frac{1 - Y_{WL}/Y_{WW}}{1 - X_{WL}/X_{WW}}$$

561 where  $Y_{WL}$  and  $Y_{WW}$  are the mean phenotypic values of a certain genotype under the respective  
562 treatments, and  $X_{WL}$  and  $X_{WW}$  are the mean performances of all genotypes.

563 Morpho-physiological correlation matrix and Density distribution were plotted with R software  
564 (RStudio Team, 2015).

565

### 566 **Broad-sense heritability dynamics**

567 Broad-sense heritability ( ${}_b h^2$ ) and its components, genetic component ( $\sigma_g^2$ ), and G×E  
568 interaction ( $\sigma_{g \times e}^2$ ), were calculated for each day of imaging across the two water treatments  
569 using ANOVA-based variance components:

570 
$$h^2 = \sigma_g^2 / \sigma_g^2 + \sigma_{g \times e}^2 / e,$$

571 where  $\sigma_g^2 = [(MS_{IL} - MS_{IL \times e}) / e]$ ,  $\sigma_{g \times e}^2 = MS_{IL \times e}$ ,  $e$  is the number of water treatments and  
572 MS is the mean square.

573

### 574 **RNA extraction and sequencing**

575 Root tissues were collected daily (8-11 day after germination) and frozen in liquid nitrogen  
576 until RNA extraction. RNA was extracted using the plant/fungi total RNA purification kit  
577 (Norgen Biotek Corp., Canada) with on-column DNase treatment (Qiagen, Germany). Sample  
578 contamination and RNA integrity were assessed using ND-1000 spectrophotometer (Thermo  
579 Fisher Scientific). Based on the physiological analysis, we selected samples from day six for  
580 RNAseq, with two repeats for each combination (total 8). Single end (150bp) bar-coded cDNA  
581 libraries were prepared for sequencing on the Illumina HiSeq2000 sequencer (NGS Core,  
582 Nebraska Medical Center Omaha, USA).

583

### 584 **Data processing and analysis**

585 FastQ quality of each sample was manually inspected using FastQC  
586 (<http://www.bioinformatics.babraham.ac.uk/projects/fastqc>). Barcode removal, filtering and  
587 trimming of low-quality reads were executed using the command line tools Trimmomatic  
588 (Bolger et al., 2014). Each RNA-seq read was trimmed to make sure the average quality score  
589 exceeded 30 and has a minimum length of 70bp. Sequences were aligned to the available Svevo  
590 and Zavitan reference genomes using TopHat (Trapnell et al., 2009), allowing for up to 2 bp

591 mismatches per read. Reads mapped to multiple genomic locations were removed. Numbers of  
592 reads per gene were counted by the software tool of HTSeq-count using corresponding rice  
593 gene annotations and the “union” resolution mode was used ([http://www-](http://www-huber.embl.de/users/anders/HTSeq/)  
594 [huber.embl.de/users/anders/HTSeq/](http://www-huber.embl.de/users/anders/HTSeq/)). Differential expression analysis of count data and data  
595 visualization were conducted with the DESeq2 package (Love et al., 2014). To detect  
596 significant DEGs, a 5% false discovery rate (FDR) correction for multiple comparisons was  
597 determined (Benjamini and Hochberg, 1995), and a minimal  $|0.5| \log_2FC$  threshold was applied.  
598 Venn diagrams were created with <http://bioinformatics.psb.ugent.be/webtools/Venn>. Gene  
599 ontology, Singular Enrichment Analysis (SEA) and Parametric Analysis of DEGs set  
600 Enrichment for biological processes and pathways was conducted with AgriGO  
601 (<http://systemsbiology.cau.edu.cn/agriGOv2>; Tian et al., 2017).

602

### 603 **Gene ontology network**

604 Biological processes and molecular function networks were established using the DEGs GO  
605 terms with REVIGO software (<http://revigo.irb.hr>); this summarizes lists of GO terms using a  
606 clustering algorithm that relies on semantic similarity measures (Supek et al., 2011). The  
607 analysis outputs were transferred to the Cytoscape software (<https://cytoscape.org/>), which  
608 served as a network biology analysis and visualization tool (Otasek et al., 2019).

609

### 610 **Genetic analysis of candidate DEGs**

611 Candidate genes were analyzed on the wheat efp browser for expression in different tissues and  
612 phenological stages ([http://bar.utoronto.ca/efp\\_wheat/cgi-bin/efpWeb.cgi](http://bar.utoronto.ca/efp_wheat/cgi-bin/efpWeb.cgi); Ramírez-González  
613 et al., 2018). Gene sequences were compared with the publically available genome of Svevo  
614 [https://wheat.pw.usda.gov/GG3/genome\\_browser](https://wheat.pw.usda.gov/GG3/genome_browser) and compared to Zavitan gene sequences  
615 with blast against the Zavitan genome [https://wheat.pw.usda.gov/cgi-](https://wheat.pw.usda.gov/cgi-bin/seqserve/blast_wheat.cgi)  
616 [bin/seqserve/blast\\_wheat.cgi](https://wheat.pw.usda.gov/cgi-bin/seqserve/blast_wheat.cgi). Differences in splice variance number of candidate genes were  
617 perceived from blast on the GrainGenes website [https://wheat.pw.usda.gov/cgi-](https://wheat.pw.usda.gov/cgi-bin/seqserve/blast_wheat.cgi)  
618 [bin/seqserve/blast\\_wheat.cgi](https://wheat.pw.usda.gov/cgi-bin/seqserve/blast_wheat.cgi). DNA translation to amino acids was done with the free online  
619 software <https://web.expasy.org/translate>

620

621 **Supplemental Data**

622 The following supplemental materials are available.

623 **Supplemental Table S1.** List of ILs and their chromosomal introgressions.

624 **Supplemental Table S2.** Correlations between morpho-physiological traits under well-  
625 watered and water-limited treatments.

626 **Supplemental Table S3.** Longitudinal coefficient of variance for PSA.

627 **Supplemental Table S4.** Comparison of morpho-physiological under two water treatments  
628 throughout the experiment for each cluster.

629 **Supplemental Table S5.** Regression equation of relative growth rate.

630 **Supplemental Table S6.** Comparisons of A, T and  $g_{sw}$  between Svevo, IL20-2 and IL46-3  
631 under two irrigation regimes throughout the experiment.

632 **Supplemental Table S7.** Comparisons of morpho-physiological traits between Svevo, IL20-  
633 2 and IL46-3 under two irrigation regimes.

634 **Supplemental Table S8.** Gene annotation within IL20-2 introgressions.

635 **Supplemental Table S9.** Hybrid genome significant differentially expressed genes.

636 **Supplemental Table S10.** Root-related candidate genes.

637 **Supplemental Figure S1.** Frequency distribution of continuance morpho-physiological traits  
638 under two irrigation regimes.

639 **Supplemental Figure S2.** Correlation matrix between morpho-physiological traits under (A)  
640 well-watered and (B) water-limited treatments.

641 **Supplemental Figure S3.** Principal component analysis of morpho-physiological traits.

642 **Supplemental Figure S4.** (A) Hierarchical clustering of morpho-physiological traits under WL  
643 and in terms of S index. (B) Clusters expression pattern.

644 **Supplemental Figure S5.** Longitudinal responsiveness dynamic of plant architecture and  
645 density.

646 **Supplemental Figure S6.** Longitudinal heritability of plant density and architecture.

647 **Supplemental Figure S7.** Longitudinal dynamics of transpiration rate.

648 **Supplemental Figure S8.** Longitudinal dynamics of shoot, root, root-to-shoot under  
649 contrasting water treatment.

650 **Supplemental Figure S9.** Differentially expressed gene ontology of (A) biological processes  
651 and (B) molecular function.

652 **Supplemental Figure S10.** Heat map of candidate genes from Zavitan expression atlas.

653 **Supplemental Figure S11.** Expression atlas of TRIDC2AG073520 in the wheat efp browser.

654 **Supplemental Figure S12.** Experimental design.

655 **Supplemental Figure S13.** Correlation between projected shoot area (PSA) and biomass DW.

656

657

658 **Acknowledgments**

659 We thank members of the Peleg and Walia labs for technical assistance with experiments. This

660 research was partially supported by the Chief Scientist of the Israel Ministry of Agriculture and

661 Rural Development to ZP, the U.S. Agency for International Development Middle East

662 Research and Cooperation (grant # M34-037) to ZP and the Agricultural Research Division

663 Wheat Innovation Fund from University of Nebraska-Lincoln to HW and TA.

664



665 **LITERATURE CITED**

- 666 **Akpinar BA, Kantar M, Budak H** (2015) Root precursors of microRNAs in wild emmer and  
667 modern wheats show major differences in response to drought stress. *Funct Integr Genomics*  
668 **15**: 587–598
- 669 **Appels R, Eversole K, Feuillet C, Keller B, Rogers J, Stein N, Pozniak CJ, Choulet F,**  
670 **Distelfeld A, Poland J, et al.** (2018) Shifting the limits in wheat research and breeding using  
671 a fully annotated reference genome. *Science* **361**: eaar7191
- 672 **Araus JL, Slafer GA, Reynolds MP, Royo C** (2002) Plant breeding and drought in C<sub>3</sub> cereals:  
673 What should we breed for? *Ann Bot* **89**: 925–940
- 674 **Arms EM, Bloom AJ, St. Clair DA** (2015) High-resolution mapping of a major effect QTL  
675 from wild tomato *Solanum habrochaites* that influences water relations under root chilling.  
676 *Theor Appl Genet* **128**: 1713–1724
- 677 **Avni R, Nave M, Barad O, Baruch K, Twardziok SO, Gundlach H, Hale I, Mascher M,**  
678 **Spannagl M, Wiebe K, et al.** (2017) Wild emmer genome architecture and diversity  
679 elucidate wheat evolution and domestication. *Science* **357**: 93–97
- 680 **Baum M, Grando S, Backes G, Jahoor A, Sabbagh A, Ceccarelli S** (2003) QTLs for  
681 agronomic traits in the Mediterranean environment identified in recombinant inbred lines of  
682 the cross “Arta” x *H. spontaneum* 41-1. *Theor Appl Genet* **107**: 1215–1225
- 683 **Benjamini Y, Hochberg Y** (1995) Controlling the false discovery rate: A practical and  
684 powerful approach to multiple testing. *J R Stat Soc B* **57**: 289–300
- 685 **Blum A** (1988) Plant breeding for stress environments. CRC Press
- 686 **Bohnert HJ, Sheveleva E** (1998) Plant stress adaptations--making metabolism move. *Curr*  
687 *Opin Plant Biol* **1**: 267–274
- 688 **Bolger AM, Lohse M, Usadel B** (2014) Trimmomatic: A flexible trimmer for Illumina  
689 sequence data. *Bioinformatics* **30**: 2114-2120.
- 690 **Bradshaw AD** (1965) Evolutionary significance of phenotypic plasticity in plants. *Adv Genet*  
691 **13**: 115-155
- 692 **Brouns F, van Rooy G, Shewry P, Rustgi S, Jonkers, D** (2019) Adverse reactions to wheat  
693 or wheat components. *Compr Rev Food Sci Food Saf* **18**: 1437-1452
- 694 **Campbell MT, Knecht AC, Berger B, Brien CJ, Wang D, Walia H** (2015) Integrating  
695 image-based phenomics and association analysis to dissect the genetic architecture of  
696 temporal salinity responses in rice. *Plant Physiol* **168**: 1476–1489
- 697 **Chaves MM, Flexas J, Pinheiro C** (2009) Photosynthesis under drought and salt stress:  
698 Regulation mechanisms from whole plant to cell. *Ann Bot* **103**: 551–560

- 699 **Fischer RA, Maurer R** (1978) Drought resistance in spring wheat cultivars. I. Grain yield  
700 responses. *Aust J Agric Res* **29**: 897–912
- 701 **Gioia T, Nagel KA, Beleggia R, Fragasso M, Ficco DBM, Pieruschka R, De Vita P, Fiorani**  
702 **F, Papa R** (2015) Impact of domestication on the phenotypic architecture of durum wheat  
703 under contrasting nitrogen fertilization. *J Exp Bot* **66**: 5519–5530
- 704 **Golan G, Ayalon I, Perry A, Zimran G, Ade-Ajayi T, Mosquna A, Distelfeld A, Peleg Z**  
705 (2019) *GNI-A1* mediates trade-off between grain number and grain weight in tetraploid  
706 wheat. *Theor Appl Genet* **132**: 2353–2365
- 707 **Golan G, Hendel E, Méndez Espitia GE, Schwartz N, Peleg Z** (2018) Activation of seminal  
708 root primordia during wheat domestication reveals underlying mechanisms of plant  
709 resilience. *Plant Cell Environ* **41**: 755–766
- 710 **Gupta A, Rico-Medina A, Caño-Delgado AI** (2020) The physiology of plant responses to  
711 drought. *Science* **368**: 266–269
- 712 **Hou X, Liang Y, He X, Shen Y, Huang Z** (2013) A novel ABA-responsive *TaSRHP* gene  
713 from wheat contributes to enhanced resistance to salt stress in *Arabidopsis thaliana*. *Plant*  
714 *Mol Biol Report* **31**: 791–801
- 715 **Colette A, Bochdanovits Z, Jansweijer VMA, Koning FG, Berke L, Sanchez-Perez GF,**  
716 **Scheres B, Heidstra R** (2011) Probing the roles of LRR RLK genes in *Arabidopsis thaliana*  
717 roots using a custom T-DNA insertion set. *Plant Mol Biol* **76**: 69–83
- 718 **Kissoudis C, van de Wiel C, Visser RGF, van der Linden G** (2016) Future-proof crops:  
719 challenges and strategies for climate resilience improvement. *Curr Opin Plant Biol* **30**: 47–  
720 56
- 721 **Knecht AC, Campbell MT, Caprez A, Swanson DR, Walia H** (2016) Image Harvest: An  
722 open-source platform for high-throughput plant image processing and analysis. *J Exp Bot*  
723 **67**: 3587–3599
- 724 **Kooyers NJ** (2015) The evolution of drought escape and avoidance in natural herbaceous  
725 populations. *Plant Sci* **234**: 155–162
- 726 **Laurie S, Halford NG** (2001) The role of protein kinases in the regulation of plant growth and  
727 development. *Plant Growth Regul* **34**: 253–265
- 728 **Lopes MS, El-Basyoni I, Baenziger PS, Singh S, Royo C, Ozbek K, Aktas H, Ozer E,**  
729 **Ozdemir F, Manickavelu A, et al** (2015) Exploiting genetic diversity from landraces in  
730 wheat breeding for adaptation to climate change. *J Exp Bot* **66**: 3477–3486
- 731 **Love MI, Huber W, Anders S** (2014) Moderated estimation of fold change and dispersion for  
732 RNA-seq data with DESeq2. *Genome Biol* **15**: 550

- 733 **Maccaferri M, El-Feki W, Nazemi G, Salvi S, Canè MA, Colalongo MC, Stefanelli S,**  
734 **Tuberosa R** (2016) Prioritizing quantitative trait loci for root system architecture in  
735 tetraploid wheat. *J Exp Bot* **67**: 1161–1178
- 736 **Maccaferri M, Harris NS, Twardziok SO, Pasam RK, Gundlach H, Spannagl M,**  
737 **Ormanbekova D, Lux T, Prade VM, Milner SG, et al.** (2019) Durum wheat genome  
738 highlights past domestication signatures and future improvement targets. *Nat Genet* **51**: 885–  
739 895
- 740 **Merchuk-Ovnat L, Fahima T, Ephrath JE, Krugman T, Saranga Y** (2017) Ancestral QTL  
741 alleles from wild emmer wheat enhance root development under drought in modern wheat.  
742 *Front Plant Sci* **8**: 1–12
- 743 **Momen M, Campbell MT, Walia H, Morota G** (2019) Utilizing trait networks and structural  
744 equation models as tools to interpret multi-trait genome-wide association studies. *Plant*  
745 *Methods* **15**:107
- 746 **Myers SS, Smith MR, Guth S, Golden CD, Vaitla B, Mueller ND, Dangour AD, Huybers**  
747 **P** (2017) Climate change and global food systems: Potential impacts on food security and  
748 undernutrition. *Annu Rev Public Health* **38**: 259–277
- 749 **Nietzsche M, Landgraf R, Tohge T, Börnke F** (2016) A protein-protein interaction network  
750 linking the energy-sensor kinase SnRK1 to multiple signaling pathways in *Arabidopsis*  
751 *thaliana*. *Curr Plant Biol* **5**: 36–44
- 752 **Opanowicz M, Vain P, Draper J, Parker D, Doonan JH** (2008) *Brachypodium distachyon*:  
753 making hay with a wild grass. *Trends Plant Sci* **13**: 172–177
- 754 **Otasek D, Morris JH, Bouças J, Pico AR, Demchak B** (2019) Cytoscape automation:  
755 Empowering workflow-based network analysis. *Genome Biol* **20**: 1–15
- 756 **Peleg Z, Fahima T, Abbo S, Krugman T, Nevo E, Yakir D, Saranga Y** (2005) Genetic  
757 diversity for drought resistance in wild emmer wheat and its ecogeographical associations.  
758 *Plant Cell Environ* **28**: 176–191
- 759 **Peleg Z, Saranga Y, Krugman T, Abbo S, Nevo E, Fahima T** (2008) Allelic diversity  
760 associated with aridity gradient in wild emmer wheat populations. *Plant Cell Environ* **31**:  
761 39–49
- 762 **Placido DF, Campbell MT, Folsom JJ, Cui X, Kruger GR, Baenziger PS, Walia H** (2013)  
763 Introgression of novel traits from a wild wheat relative improves drought adaptation in  
764 wheat. *Plant Physiol* **161**: 1806–1819
- 765 **Poot P, Lambers H** (2008) Shallow-soil endemics: Adaptive advantages and constraints of a  
766 specialized root-system morphology. *New Phytol* **178**: 371–381

- 767 **Ramírez-González RH, Borrill P, Lang D, Harrington SA, Brinton J, Venturini L, Davey**  
768 **M, Jacobs J, Van Ex F, Pasha A, et al.** (2018) The transcriptional landscape of polyploid  
769 wheat. *Science* **361**: eaar6089.
- 770 **Rellán-Álvarez R, Lobet G, Dinneny JR** (2016) Environmental control of root system  
771 biology. *Annu Rev Plant Biol* **67**: 619–642
- 772 **Reynolds MP, Hobbs PR, Braun HJ** (2007) Challenges to international wheat improvement.  
773 *J Agric Sci* **145**: 223–227
- 774 **Robbins NE, Dinneny JR** (2015) The divining root: Moisture-driven responses of roots at the  
775 micro- and macro-scale. *J Exp Bot* **66**: 2145–2154
- 776 **Rodrigues M, Chaves M, Wendler R, David M, Quick W, Leegood R, Stitt M, Pereira J**  
777 (1993) Osmotic adjustment in water stressed grapevine leaves in relation to carbon  
778 assimilation. *Funct Plant Biol* **20**: 309
- 779 **Rojas M, Lambert F, Ramirez-Villegas J, Challinor AJ** (2019) Emergence of robust  
780 precipitation changes across crop production areas in the 21<sup>st</sup> century. *Proc Natl Acad Sci*  
781 *USA* **116**: 6673–6678
- 782 **Roucou A, Violle C, Fort F, Roumet P, Ecarnot M, Vile D** (2018) Shifts in plant functional  
783 strategies over the course of wheat domestication. *J Appl Ecol* **55**: 25–37
- 784 **RStudio Team** (2015) RStudio: Integrated Development Environment for R.
- 785 **Sherrard ME, Maherali H** (2006) The adaptive significance of drought escape in *Avena*  
786 *barbata*, an annual grass. *Evolution* **60**: 2478–2489
- 787 **Shiple B, Meziane D** (2002) The balanced-growth hypothesis and the allometry of leaf and  
788 root biomass allocation. *Funct Ecol* **16**: 326–331
- 789 **Siddique KHM, Tennant D, Perry MW, Belford RK** (1990) Water use and water use  
790 efficiency of old and modern wheat cultivars in a Mediterranean-type environment. *Aust J*  
791 *Agric Res* **41**: 431–447
- 792 **Sun XL, Yu QY, Tang LL, Ji W, Bai X, Cai H, Liu XF, Ding XD, Zhu YM** (2013) GsSRK,  
793 a G-type lectin S-receptor-like serine/threonine protein kinase, is a positive regulator of plant  
794 tolerance to salt stress. *J Plant Physiol* **170**: 505–515
- 795 **Supek F, Bošnjak M, Škunca N, Šmuc T** (2011) Revigo summarizes and visualizes long lists  
796 of gene ontology terms. *PLoS One* **6**: e21800
- 797 **Teotia S, Lamb RS** (2011) RCD1 and SRO1 are necessary to maintain meristematic fate in  
798 *Arabidopsis thaliana*. *J Exp Bot* **62**: 1271–1284
- 799 **Tian T, Liu Y, Yan H, You Q, Yi X, Du Z, Xu W, Su Z** (2017) AgriGO v2.0: A GO analysis  
800 toolkit for the agricultural community. *Nucleic Acids Res* **45**: 122–129

- 801 **Trapnell C, Pachter L, Salzberg SL** (2009). TopHat: Discovering splice junctions with RNA-  
802 Seq. *Bioinformatics*. **25**: 1105–11.
- 803 **Tsujimura Y, Sugiyama S, Otsuka K, Htun TM, Numaguchi K, Castillo C, Akagi T, Ishii**  
804 **T, Ishikawa R** (2019) Detection of a novel locus involved in non-seed-shattering behaviour  
805 of Japonica rice cultivar, *Oryza sativa* 'Nipponbare'. *Theor Appl Genet* **132**: 2615–2623
- 806 **Virlet N, Sabermanesh K, Sadeghi-Tehran P, Hawkesford MJ** (2017) Field Scanalyzer: An  
807 automated robotic field phenotyping platform for detailed crop monitoring. *Funct Plant Biol*  
808 **44**: 143–153
- 809 **Voss-Fels KP, Robinson H, Mudge SR, Richard C, Newman S, Wittkop B, Stahl A, Friedt**  
810 **W, Frisch M, Gabur I, et al.** (2018) *VERNALIZATION1* modulates root system architecture  
811 in wheat and barley. *Mol Plant* **11**: 226–229
- 812 **Ward Jr, Joe H** (1963) Hierarchical grouping to optimize an objective function. *Assoc Stat*  
813 *Am J* **58**: 236-244
- 814 **Yang W, Feng H, Zhang X, Zhang J, Doonan JH, Batchelor WD, Xiong L, Yan J** (2020)  
815 Crop phenomics and high-throughput phenotyping: Past decades, current challenges, and  
816 future perspectives. *Mol Plant* **13**: 187–214
- 817 **Yang Z, Zheng H, Wei X, Song J, Wang B, Sui N** (2018) Transcriptome analysis of sweet  
818 Sorghum inbred lines differing in salt tolerance provides novel insights into salt exclusion  
819 by roots. *Plant Soil* **430**: 423–439
- 820 **Zadoks JC, Chang TT, Konzak CF, Fryer JD** (1974) A decimal code for the growth stages  
821 of cereals. *Weed Res* **14**: 415-421
- 822
